# Supplementary material
Source: publisher figshare collection journal article supplement (https://springernature.figshare.com/ndownloader/files/18079337)
Supplement: Supplementary file [file 18079337]

**Supplementary Figure 3.** Taxonomic annotation of longitudinal case studies using bacterial 16S marker gene sequenced species

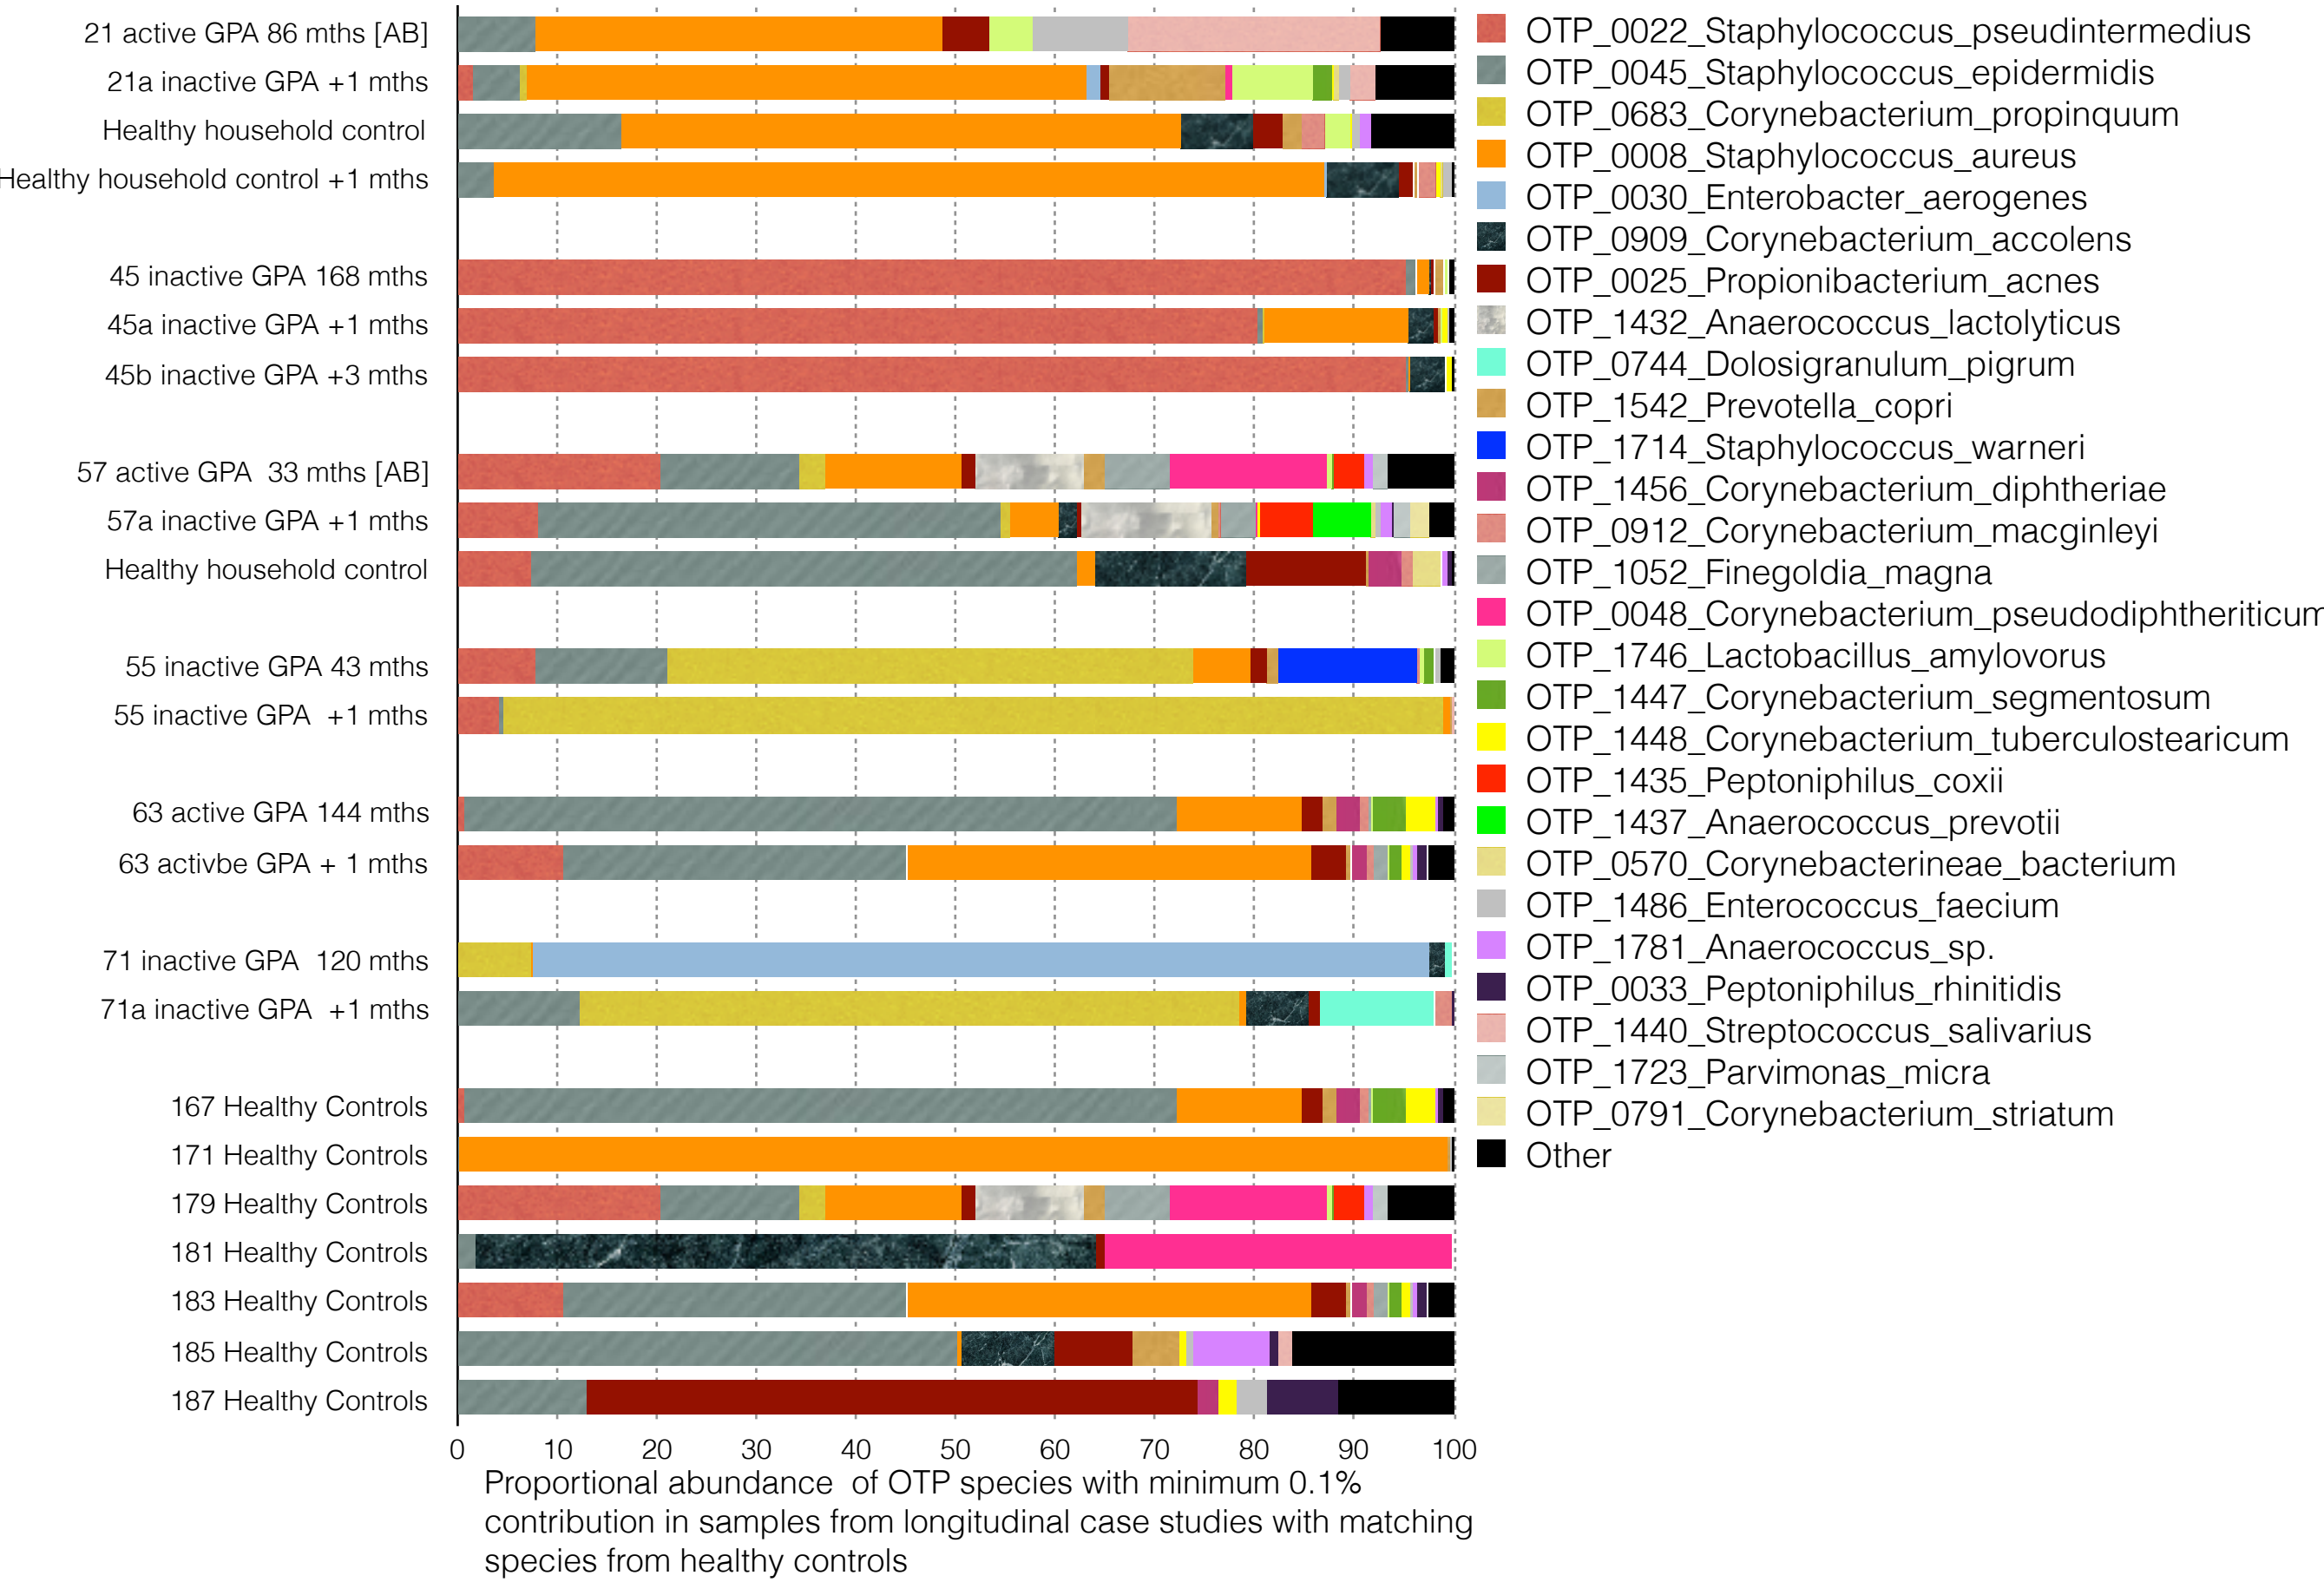

**Supplementary Figure 3.** Taxonomic annotation of longitudinal case studies using bacterial 16S marker gene sequenced species

Bacterial diversity in six patients with follow up sampling one month ( $n = 6$ ) and 3 months later ( $n = 1$ ) is shown. In two case studies, household controls at initial sampling time point ( $n = 2$ ) and one months later ( $n = 1$ ) were also available. For comparisons, seven healthy controls are shown at the bottom of the figure. The abundance of the top 27 species with a minimum 0.1% contribution in samples from longitudinal case studies with matching species from healthy controls are shown on the x axis.
